# Supplementary material for: Detection and discrimination of sulfur dioxide using a colorimetric sensor array
Source: Royal Society of Chemistry journal article supplement (doi:10.1039/d2ra04251g), 2022-01-01
Supplement: d2ra04251g1.pdf [file d2ra04251g1.pdf]

Supporting Information

**Detection and discrimination of sulfur dioxide using a  
colorimetric sensor array**

Chaoqiang Ding<sup>1</sup>, Yan Ren<sup>1</sup>, Xinyang Liu<sup>1</sup>, Jingjing Zeng<sup>1</sup>, Xinping Yu<sup>1</sup>, Daxiang Zhou<sup>1</sup>,  
Yanjie Li<sup>1,2\*</sup>

*<sup>1</sup>College of Biology and Food Engineering, Chongqing Three Gorges University, Wanzhou,  
Chongqing 404100, P.R. China.*

*<sup>2</sup>Engineering Technology Research Center for the Development and Utilization of Characteristic  
Biological Resources in Northeast Chongqing, Chongqing Three Gorges University, Wanzhou,  
Chongqing 404100, P.R. China.*

\*Corresponding author: Dr. Yanjie Li

College of biology and food engineering,

Chongqing Three Gorges University,

Wanzhou, Chongqing 404100,

P.R. China.

Tel.: +86 23 5810 2522;

Fax: +86 23 5810 2522;

E-mail address: 20060016@sanxiau.edu.cn (Y.J.Li).

---

\* To whom correspondence should be addressed.  
E-mail: 20060016@sanxiau.edu.cn

## Figure/Table of contents

|                                                                                                                                     |           |
|-------------------------------------------------------------------------------------------------------------------------------------|-----------|
| Composition of the developed 1×6 array .....                                                                                        | Table S1  |
| Principle of specific reaction with sulfur dioxide and limits of detection of six prepared dyes<br>based on spectrophotometry ..... | Figure S1 |
| Comparison of LOD of sulfur dioxide by different common methods.....                                                                | Table S2  |
| Color difference maps of different interferents with and without sulfur dioxide.....                                                | Figure S2 |
| A PCA plot of different interferents with and without sulfur dioxide .....                                                          | Figure S3 |
| A PCA diagram of sulfur dioxide with different concentrations. ....                                                                 | Figure S4 |
| Difference maps of <i>fritillaria</i> samples with different concentrations of sulfur dioxide....                                   | Figure S5 |

Table S1. Composition of the developed 1 × 6 array

|   |                                                                                                                                                               |
|---|---------------------------------------------------------------------------------------------------------------------------------------------------------------|
| 1 | Sulfur dioxide kit(Based on the principle of hydrochloric para-rosaniline)                                                                                    |
| 2 | 80µg/mL Brilliant Green in 10mM PBS(pH=7)                                                                                                                     |
| 3 | 46.34µg/mL Malachite Green in 10mM PBS(pH=7)                                                                                                                  |
| 4 | 55µg/mL Basic Fuchsin in 1.47mM Borax buffer solution(pH=9.16)                                                                                                |
| 5 | 1.34×10 <sup>-2</sup> µg/mL o-Phthalaldehyde + 3.85×10 <sup>-3</sup> µg/mL ammonium acetate in 4mM potassium dihydrogen phosphate buffer (pH=6.6)             |
| 6 | 3.6×10 <sup>-3</sup> µg/mL 1,10-Phenanthroline,3.24×10 <sup>-3</sup> µg/mL Iron(III) chloride + CTAB(0.5%) in 0.5Mm Sodium acetate anhydrous solution(pH=5.5) |

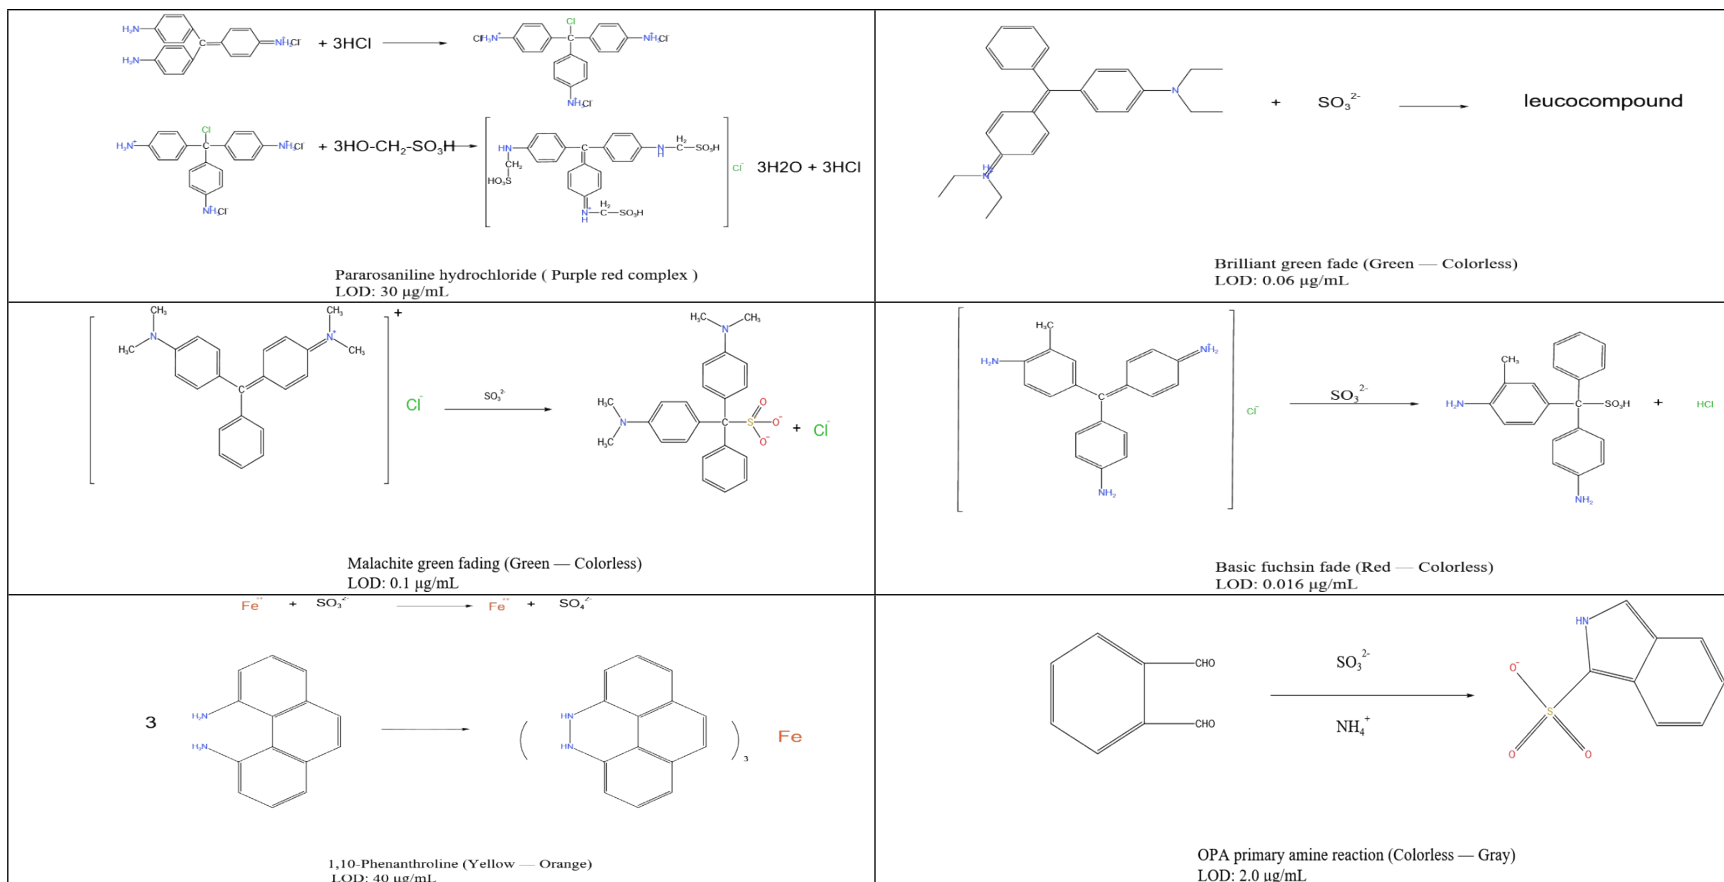

Figure S1. Principle of specific reaction with sulfur dioxide and limits of detection of six prepared dyes based on spectrophotometry.

Note: The above six reactions are based on the specific color reaction with sulfite.

Table S2. Comparison of detection limits of sulfur dioxide by different common methods

| Methods                                 | LOD ( $\mu\text{g/mL}$ ) | References   |
|-----------------------------------------|--------------------------|--------------|
| Spectrophotometry                       | 4.0                      | Ref [15]     |
| Acid-base titration                     | 1.50                     | Ref [16]     |
| Fluorescence method                     | $6.29 \times 10^{-3}$    | Ref [17, 18] |
| Gas chromatography-mass spectrometry    | $1.5 \times 10^{-3}$     | Ref [19]     |
| High-performance liquid chromatography  | 0.30                     | Ref [20]     |
| Electrochemical analysis                | 0.40                     | Ref [21]     |
| Enzyme-linked immunosorbent assays      | 0.46                     | Ref [22]     |
| Fourier-transform infrared spectroscopy | 0.80                     | Ref [23]     |
| Colorimetric sensor array               | 0.406                    |              |

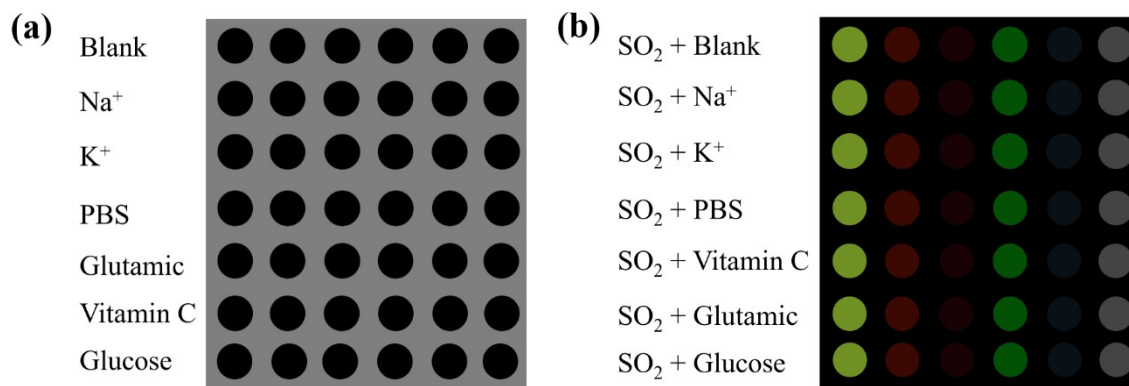

Figure S2. Color difference maps of different interferents with and without sulfur dioxide. (a) Difference maps of different interferents with final concentration of 100 µg/mL. (b) Difference maps of different interferents with final concentration of 100 µg/mL and sulfur dioxide with final concentration of 10 µg/mL.

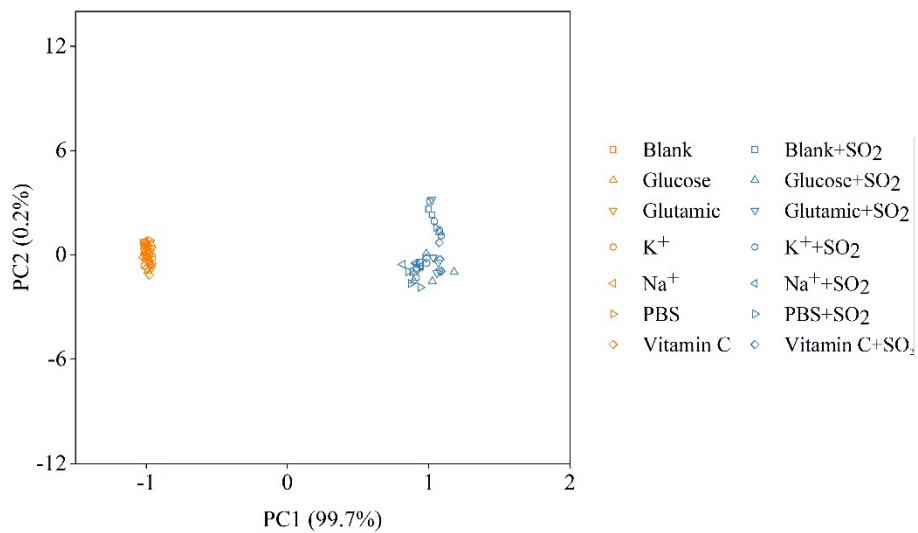

Figure S3. A PCA plot of different interferents with and without sulfur dioxide.

Note: interferents (e.g., Blank, Na<sup>+</sup>, K<sup>+</sup>, PBS, vitamin C, glutamic acid, glucose, final concentration 100 µg /mL), sulfur dioxide (final concentration 100 µg/mL). All of the experiments were performed in quintuplicate.

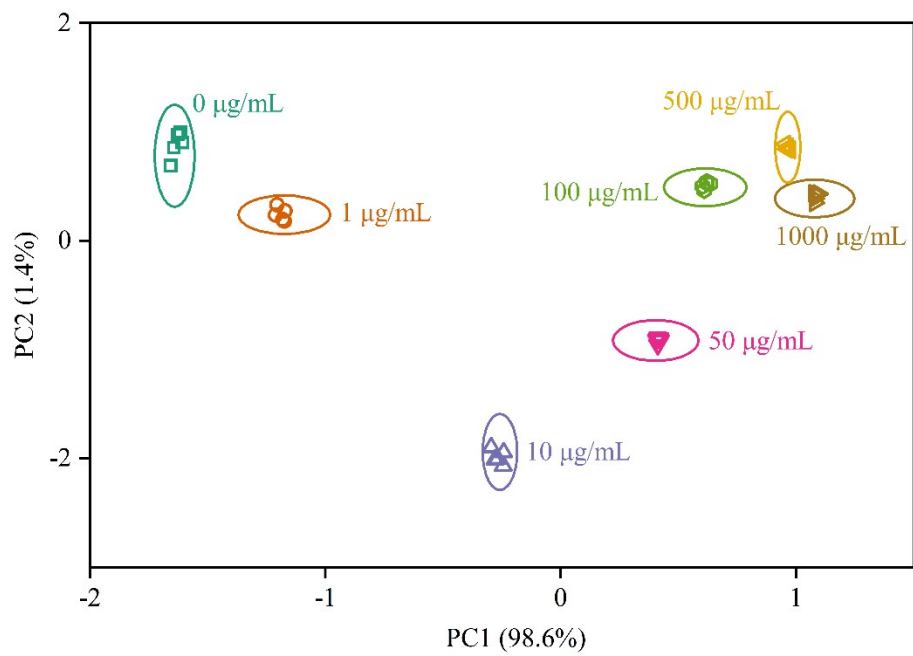

Figure S4. A PCA diagram of sulfur dioxide with different concentrations. All of the experiments were performed in quintuplicate.



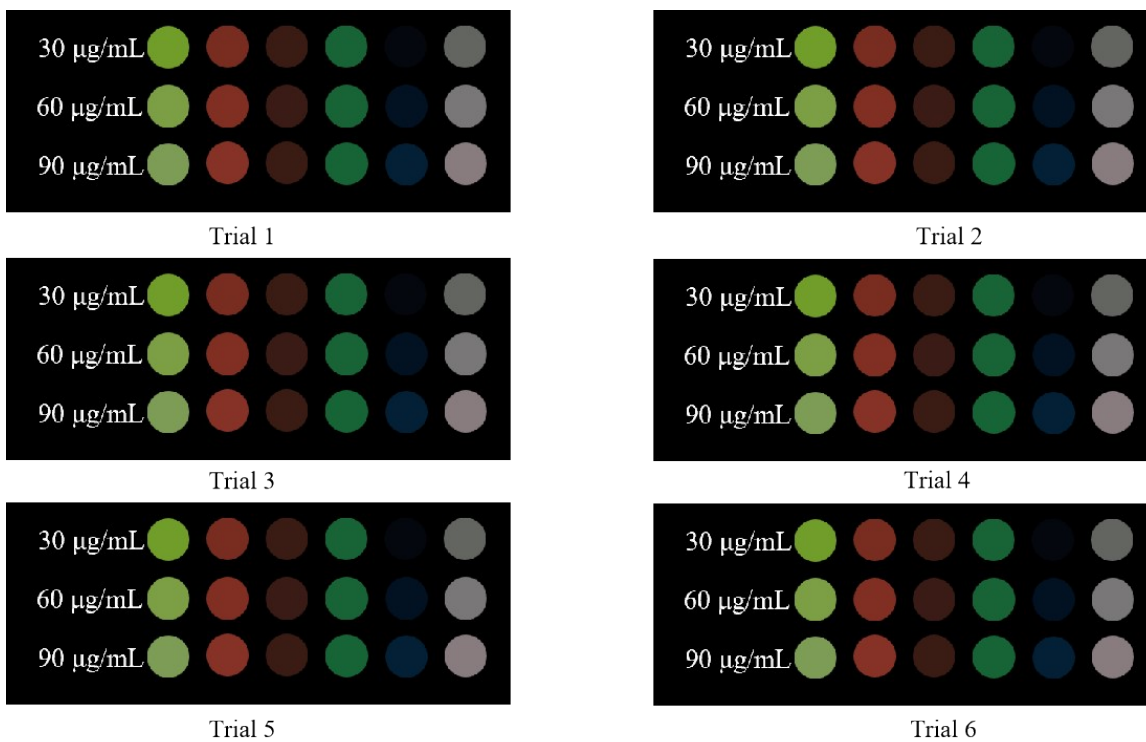

Figure S5. Difference maps of *fritillaria* samples with different concentrations of sulfur dioxide. All of the experiments were performed in sextuplicate.
